# Supplementary material
Source: publisher site journal article supplement (https://www.dovepress.com/article/497621)
Supplement: Supplementary file 1 [file get_supplementary_file.php]

**Supplement Table1 Hosmer and Lemeshow Test**

| Steps | Chi-square | Df | Distinctiveness |
| --- | --- | --- | --- |
|  | 2.990 | 8 | 0.935 |

**Supplement Table2 Model summary**

| Steps | -2 Logarithmic similarity | Cox & Snell R Square | Nagelkerke R Square |
| --- | --- | --- | --- |
|  | 235.455 | 0.246 | 0.330 |

**Supplement Table3 Classification table**

| Observations | | | Predicted value | | |
| --- | --- | --- | --- | --- | --- |
| Group | |  |
| EC | NC | Exact percentage |
| Step | Group | EC | 62 | 30 | 67.4 |
| NC | 26 | 100 | 79.4 |
|  | Overall percentage |  |  |  | 74.3 |

**Supplement Table4 Observation value list**

| Observations | Selected status | Observations | Predicted value | Predicted group | Temporary variables | |
| --- | --- | --- | --- | --- | --- | --- |
| Group | Poor | Z Poor |
| 187 | S | N | 0.028 | E | 0.972 | 5.908 |

**Supplement Table5 Multicollinearity test**

| Model | Non-standardized | | Standardization | T | Distinctiveness | Collinearity statistical data | |
| --- | --- | --- | --- | --- | --- | --- | --- |
| B | Standards | Beta | Tolerance | VIF |
| constant | 0.778 | 0.052 |  | 14.834 | 0.000 |  |  |
| NAFLD | -0.079 | 0.081 | -0.064 | -0.980 | 0.328 | 0.838 | 1.193 |
| HSI | -0.417 | 0.105 | -0.259 | -3.975 | 0.000 | 0.834 | 1.199 |
| GGT | -0.062 | 0.063 | -0.063 | -0.994 | 0.321 | 0.893 | 1.120 |
| HDL-C | 0.072 | 0.067 | 0.065 | 1.069 | 0.286 | 0.952 | 1.050 |
| CA125 | -0.308 | 0.061 | -0.309 | -5.051 | 0.000 | 0.948 | 1.055 |
